# Supplementary material for: On the Wrong Track: Alterations of Ciliary Transport in Inherited Retinal Dystrophies
Source: PubMed Central journal article supplement (PMC7973215; doi:10.3389/fcell.2021.623734), 2021-03-05
Supplement: Table_1.pdf [file Table_1.pdf]

**TABLE 1. Comprehensive list of ciliary genes associated with retinal dystrophies in syndromic and non-syndromic disorders<sup>a,b,c</sup>.**

|               | Non-syndromic retinal ciliopathies |      |     |    | Syndromic ciliopathies with retinal degeneration |     |     |      |       |      |       |     |      |      |      |     |      |     | Other ciliopathies without retinal degeneration |      |      |      |     | References |                                                      |
|---------------|------------------------------------|------|-----|----|--------------------------------------------------|-----|-----|------|-------|------|-------|-----|------|------|------|-----|------|-----|-------------------------------------------------|------|------|------|-----|------------|------------------------------------------------------|
|               | RP                                 | CORD | LCA | MD | AS                                               | BBS | CED | CILD | CRDHL | JBTS | MCCRP | MKS | MORM | MRC5 | OFDS | SLS | SRTD | USH | COACH                                           | LGMD | MKKS | NPHP | NSD |            | SGBS                                                 |
| <i>AHI1</i>   | ✓                                  |      |     |    |                                                  |     |     |      |       | ✓    |       |     |      |      |      |     |      |     |                                                 |      |      |      |     |            | (Nguyen et al., 2017)                                |
| <i>AIPL1</i>  |                                    | ✓    | ✓   |    |                                                  |     |     |      |       |      |       |     |      |      |      |     |      |     |                                                 |      |      |      |     |            | (Sacristan-Reviriego et al., 2020)                   |
| <i>ALMS1</i>  |                                    | ✓    | ✓   |    | ✓                                                |     |     |      |       |      |       |     |      |      |      |     |      |     |                                                 |      |      |      |     |            | (Xu et al., 2016)                                    |
| <i>ARL13B</i> |                                    |      |     |    |                                                  |     |     |      |       | ✓    |       |     |      |      |      |     |      |     |                                                 |      |      |      |     |            | (Cantagrel et al., 2008)                             |
| <i>ARL2</i>   |                                    |      |     |    |                                                  |     |     |      |       |      |       |     |      | ✓    |      |     |      |     |                                                 |      |      |      |     |            | (Cai et al., 2019)                                   |
| <i>ARL2BP</i> | ✓                                  |      |     |    |                                                  |     |     |      |       |      |       |     |      |      |      |     |      |     |                                                 |      |      |      |     |            | (Davidson et al., 2013)                              |
| <i>ARL3</i>   | ✓                                  | ✓    |     |    |                                                  |     |     |      |       | ✓    |       |     |      |      |      |     |      |     |                                                 |      |      |      |     |            | (Sheikh et al., 2019)                                |
| <i>ARL6</i>   | ✓                                  |      |     |    |                                                  | ✓   |     |      |       |      |       |     |      |      |      |     |      |     |                                                 |      |      |      |     |            | (Zenteno et al., 2020)                               |
| <i>ARMC9</i>  |                                    |      |     |    |                                                  |     |     |      |       | ✓    |       |     |      |      |      |     |      |     |                                                 |      |      |      |     |            | (Van De Weghe et al., 2017)                          |
| <i>ARSG</i>   |                                    |      |     |    |                                                  |     |     |      |       |      |       |     |      |      |      |     |      | ✓   |                                                 |      |      |      |     |            | (Abad-Morales et al., 2020)                          |
| <i>B9D1</i>   |                                    |      |     |    |                                                  |     |     |      |       | ✓    |       | ✓   |      |      |      |     |      |     |                                                 |      |      |      |     |            | (Romani et al., 2014)                                |
| <i>B9D2</i>   |                                    |      |     |    |                                                  |     |     |      |       | ✓    |       | ✓   |      |      |      |     |      |     |                                                 |      |      |      |     |            | (Radhakrishnan et al., 2019)                         |
| <i>BBS1</i>   | ✓                                  |      |     |    |                                                  | ✓   |     |      |       | ✓    |       |     |      |      |      |     |      |     |                                                 |      |      |      |     |            | (Estrada-Cuzcano et al., 2012a; Suzuki et al., 2016) |
| <i>BBS10</i>  |                                    |      |     |    |                                                  | ✓   |     |      |       |      |       |     |      |      |      |     |      |     |                                                 |      |      |      |     |            | (Suspitsin and Imyanitov, 2016)                      |
| <i>BBS12</i>  |                                    |      |     |    |                                                  | ✓   |     |      |       |      |       |     |      |      |      |     |      |     |                                                 |      |      |      |     |            | (Suspitsin and Imyanitov, 2016)                      |
| <i>BBS18</i>  |                                    |      |     |    |                                                  | ✓   |     |      |       |      |       |     |      |      |      |     |      |     |                                                 |      |      |      |     |            | (Suspitsin and Imyanitov, 2016)                      |
| <i>BBS2</i>   | ✓                                  |      |     |    |                                                  | ✓   |     |      |       |      |       |     |      |      |      |     |      |     |                                                 |      |      |      |     |            | (Suspitsin and Imyanitov, 2016)                      |

|                | Non-syndromic retinal ciliopathies |      |     |    | Syndromic ciliopathies with retinal degeneration |     |     |      |       |      |       |     |      |      |      |     |      |     | Other ciliopathies without retinal degeneration |      |      |      |     |      | References                                  |
|----------------|------------------------------------|------|-----|----|--------------------------------------------------|-----|-----|------|-------|------|-------|-----|------|------|------|-----|------|-----|-------------------------------------------------|------|------|------|-----|------|---------------------------------------------|
|                | RP                                 | CORD | LCA | MD | AS                                               | BBS | CED | CILD | CRDHL | JBTS | MCCRP | MKS | MORM | MRC5 | OFDS | SLS | SRTD | USH | COACH                                           | LGMD | MKKS | NPHP | NSD | SGBS |                                             |
| <i>BBS4</i>    |                                    |      |     |    |                                                  | ✓   |     |      |       |      |       |     |      |      |      |     |      |     |                                                 |      |      |      |     |      | (Suspitsin and Imyanitov, 2016)f            |
| <i>BBS5</i>    |                                    |      |     |    |                                                  | ✓   |     |      |       |      |       |     |      |      |      |     |      |     |                                                 |      |      |      |     |      | (Suspitsin and Imyanitov, 2016)             |
| <i>BBS7</i>    |                                    |      |     |    |                                                  | ✓   |     |      |       |      |       |     |      |      |      |     |      |     |                                                 |      |      |      |     |      | (Suspitsin and Imyanitov, 2016)             |
| <i>BBS8</i>    | ✓                                  |      |     |    |                                                  | ✓   |     |      |       |      |       |     |      |      |      |     |      |     |                                                 |      |      |      |     |      | (Suspitsin and Imyanitov, 2016)             |
| <i>BBS9</i>    |                                    |      |     |    |                                                  | ✓   |     |      |       |      |       |     |      |      |      |     |      |     |                                                 |      |      |      |     |      | (Suspitsin and Imyanitov, 2016)             |
| <i>C2orf71</i> | ✓                                  | ✓    |     |    |                                                  |     |     |      |       |      |       |     |      |      |      |     |      |     |                                                 |      |      |      |     |      | (Corral-Serrano et al., 2018)               |
| <i>C8orf37</i> | ✓                                  | ✓    |     |    |                                                  | ✓   |     |      |       |      |       |     |      |      |      |     |      |     |                                                 |      |      |      |     |      | (Tatour and Ben-yosef, 2020)                |
| <i>CC2D2A</i>  | ✓                                  |      |     |    |                                                  |     |     |      | ✓     |      | ✓     |     |      |      |      |     |      | ✓   |                                                 |      |      |      |     |      | (Mjécaese et al., 2019)                     |
| <i>CDH23</i>   |                                    |      |     |    |                                                  |     |     |      |       |      |       |     |      |      |      |     | ✓    |     |                                                 |      |      |      | ✓   |      | (Whatley et al., 2020)                      |
| <i>CEP104</i>  |                                    |      |     |    |                                                  |     |     |      | ✓     |      |       |     |      |      |      |     |      |     |                                                 |      |      |      |     |      | (Bachmann-Gagescu et al., 2020)             |
| <i>CEP120</i>  |                                    |      |     |    |                                                  |     |     |      | ✓     |      |       |     |      |      |      |     | ✓    |     |                                                 |      |      |      |     |      | (Bachmann-Gagescu et al., 2020)             |
| <i>CEP164</i>  |                                    |      |     |    |                                                  |     |     |      |       |      |       |     |      |      |      | ✓   |      |     |                                                 |      |      | ✓    |     |      | (Chaki et al., 2012)                        |
| <i>CEP19</i>   |                                    |      |     |    |                                                  | ✓   |     |      |       |      |       |     |      |      |      |     |      |     |                                                 |      |      |      |     |      | (Kanie et al., 2017)                        |
| <i>CEP250</i>  | ✓                                  |      |     |    |                                                  |     |     | ✓    |       |      |       |     |      |      |      |     |      | ✓   |                                                 |      |      |      |     |      | (Kubota et al., 2018)                       |
| <i>CEP290</i>  | ✓                                  | ✓    | ✓   |    |                                                  | ✓   |     |      | ✓     |      | ✓     |     |      |      |      | ✓   |      |     |                                                 |      |      | ✓    |     |      | (Rachel et al., 2012; Roosing et al., 2017) |
| <i>CEP41</i>   |                                    |      |     |    |                                                  |     |     |      | ✓     |      |       |     |      |      |      |     |      |     |                                                 |      |      |      |     |      | (Bachmann-Gagescu et al., 2020)             |
| <i>CEP78</i>   |                                    | ✓    |     |    |                                                  |     |     | ✓    |       |      |       |     |      |      |      |     |      |     |                                                 |      |      |      |     |      | (Namburi et al., 2016; Gill et al., 2019)   |

|                | Non-syndromic retinal ciliopathies |      |     |    | Syndromic ciliopathies with retinal degeneration |     |     |      |       |      |       |     |      |      |      |     |      |     |       | Other ciliopathies without retinal degeneration |      |      |     |      |                                            | References |
|----------------|------------------------------------|------|-----|----|--------------------------------------------------|-----|-----|------|-------|------|-------|-----|------|------|------|-----|------|-----|-------|-------------------------------------------------|------|------|-----|------|--------------------------------------------|------------|
|                | RP                                 | CORD | LCA | MD | AS                                               | BBS | CED | CILD | CRDHL | JBTS | MCCRP | MKS | MORM | MRC5 | OFDS | SLS | SRTD | USH | COACH | LGMD                                            | MKKS | NPHP | NSD | SGBS |                                            |            |
| <i>CEP83</i>   |                                    |      |     |    |                                                  |     |     |      |       | ✓    |       |     |      |      |      |     |      |     |       |                                                 |      | ✓    |     |      | (Braun and Hildebrandt, 2017)              |            |
| <i>CLRN1</i>   | ✓                                  |      |     |    |                                                  |     |     |      |       |      |       |     |      |      |      |     |      | ✓   |       |                                                 |      |      |     |      | (Tatour and Ben-yosef, 2020)               |            |
| <i>CSPP1</i>   |                                    |      |     |    |                                                  |     |     |      |       | ✓    |       |     |      |      |      |     |      |     |       |                                                 |      |      |     |      | (Bachmann-Gagescu et al., 2020)            |            |
| <i>DYNC2H1</i> | ✓                                  |      |     |    |                                                  |     |     |      |       |      |       |     |      |      |      |     | ✓    |     |       |                                                 |      |      |     |      | (Vig et al., 2020)                         |            |
| <i>FAM161A</i> | ✓                                  |      |     |    |                                                  |     |     |      |       |      |       |     |      |      |      |     |      |     |       |                                                 |      |      |     |      | (Bachmann-Gagescu and Neuhaus, 2019)       |            |
| <i>FSCN2</i>   | ✓                                  |      |     |    |                                                  |     |     |      |       |      |       |     |      |      |      |     |      |     |       |                                                 |      |      |     |      | (Chen et al., 2019)                        |            |
| <i>IFT139</i>  |                                    |      |     |    |                                                  |     |     |      |       |      |       |     |      |      |      |     | ✓    |     |       |                                                 |      | ✓    |     |      | (Niwa, 2016)                               |            |
| <i>IFT140</i>  | ✓                                  |      | ✓   |    |                                                  |     |     |      |       |      |       |     |      |      |      |     | ✓    |     |       |                                                 |      |      |     |      | (Xu et al., 2015)                          |            |
| <i>IFT144</i>  |                                    |      |     |    |                                                  |     | ✓   |      |       |      |       |     |      |      | ✓    | ✓   |      |     |       |                                                 |      | ✓    |     |      | (Braun and Hildebrandt, 2017)              |            |
| <i>IFT172</i>  | ✓                                  |      |     |    |                                                  | ✓   |     |      |       | ✓    |       |     |      |      | ✓    | ✓   |      |     |       |                                                 |      |      |     |      | (Yamada et al., 2019)                      |            |
| <i>IFT27</i>   |                                    |      |     |    |                                                  | ✓   |     |      |       |      |       |     |      |      |      |     |      |     |       |                                                 |      |      |     |      | (Suspitsin and Imyanitov, 2016)            |            |
| <i>IFT38</i>   |                                    |      | ✓   |    |                                                  |     |     |      |       |      |       |     |      |      |      |     |      |     |       |                                                 |      |      |     |      | (Soens et al., 2016)                       |            |
| <i>IFT43</i>   | ✓                                  |      |     |    |                                                  | ✓   |     |      |       |      |       |     |      |      |      |     | ✓    |     |       |                                                 |      |      |     |      | (Biswas et al., 2017)                      |            |
| <i>IFT52</i>   |                                    |      |     |    |                                                  | ✓   |     |      |       |      |       |     |      |      |      |     | ✓    |     |       |                                                 |      |      |     |      | (Girisha et al., 2016; Chen et al., 2018)  |            |
| <i>IFT54</i>   |                                    |      |     |    |                                                  | ✓   |     |      |       |      |       |     |      |      | ✓    | ✓   |      |     |       |                                                 |      |      |     |      | (Bizet et al., 2015; Zhang et al., 2018)   |            |
| <i>IFT80</i>   |                                    |      |     |    |                                                  |     |     |      |       |      |       |     |      |      |      |     | ✓    |     |       |                                                 |      |      |     |      | (Zhang et al., 2018)                       |            |
| <i>IFT81</i>   |                                    | ✓    |     |    |                                                  |     |     |      |       |      |       |     |      |      |      |     | ✓    |     |       |                                                 |      |      |     |      | (Duran et al., 2016; Dharmat et al., 2017) |            |

|                 | Non-syndromic retinal ciliopathies |      |     |    | Syndromic ciliopathies with retinal degeneration |     |     |      |       |      |       |     |      |      |      |     |      |     |       | Other ciliopathies without retinal degeneration |      |      |     |      | References                                   |
|-----------------|------------------------------------|------|-----|----|--------------------------------------------------|-----|-----|------|-------|------|-------|-----|------|------|------|-----|------|-----|-------|-------------------------------------------------|------|------|-----|------|----------------------------------------------|
|                 | RP                                 | CORD | LCA | MD | AS                                               | BBS | CED | CILD | CRDHL | JBTS | MCCRP | MKS | MORM | MRC5 | OFDS | SLS | SRTD | USH | COACH | LGMD                                            | MKKS | NPHP | NSD | SGBS |                                              |
| <i>INPP5E</i>   |                                    |      | ✓   |    |                                                  |     |     |      |       | ✓    |       |     | ✓    |      |      |     |      |     |       |                                                 |      |      |     |      | (Wang and Deretic, 2014; Fansa et al., 2016) |
| <i>INVS</i>     |                                    |      |     |    |                                                  |     |     |      |       |      |       |     |      |      |      | ✓   |      |     |       |                                                 |      | ✓    |     |      | (O'Toole et al., 2006)                       |
| <i>KCNJ13</i>   |                                    |      | ✓   |    |                                                  |     |     |      |       |      |       |     |      |      |      |     |      |     |       |                                                 |      |      |     |      | (Sergouniotis et al., 2011)                  |
| <i>KIAA0556</i> |                                    |      |     |    |                                                  |     |     |      |       | ✓    |       |     |      |      |      |     |      |     |       |                                                 |      |      |     |      | (Bachmann-Gagescu et al., 2020)              |
| <i>KIAA0586</i> |                                    |      |     |    |                                                  |     |     |      |       | ✓    |       |     |      |      |      |     | ✓    |     |       |                                                 |      |      |     |      | (Bachmann-Gagescu et al., 2020)              |
| <i>KIAA1549</i> | ✓                                  |      |     |    |                                                  |     |     |      |       |      |       |     |      |      |      |     |      |     |       |                                                 |      |      |     |      | (De Bruijn et al., 2018)                     |
| <i>KIF3B</i>    |                                    |      |     |    |                                                  |     |     |      |       |      |       |     |      |      |      | ✓   |      |     |       |                                                 |      |      |     |      | (Cogné et al., 2020)                         |
| <i>KIF7</i>     |                                    |      |     |    |                                                  |     |     |      |       | ✓    |       |     |      |      |      |     |      |     |       |                                                 |      |      |     |      | (Bachmann-Gagescu et al., 2020)              |
| <i>KIZ</i>      | ✓                                  |      |     |    |                                                  |     |     |      |       |      |       |     |      |      |      |     |      |     |       |                                                 |      |      |     |      | (El Shamieh et al., 2014)                    |
| <i>LCA5</i>     | ✓                                  | ✓    | ✓   |    |                                                  |     |     |      |       |      |       |     |      |      |      |     |      |     |       |                                                 |      |      |     |      | (Chen et al., 2016)                          |
| <i>LZTFL1</i>   |                                    |      |     |    |                                                  | ✓   |     |      |       |      |       |     |      |      |      |     |      |     |       |                                                 |      |      |     |      | (Susptsin and Imyanitov, 2016)               |
| <i>MAK</i>      | ✓                                  |      |     |    |                                                  |     |     |      |       |      |       |     |      |      |      |     |      |     |       |                                                 |      |      |     |      | (Gray et al., 2018)                          |
| <i>MKKS</i>     |                                    |      |     |    |                                                  | ✓   |     |      |       |      |       |     |      |      |      |     |      |     |       |                                                 | ✓    |      |     |      | (Susptsin and Imyanitov, 2016)               |
| <i>MKS1</i>     |                                    |      |     |    |                                                  | ✓   |     |      |       | ✓    |       | ✓   |      |      |      |     |      |     |       |                                                 |      |      |     |      | (Bader et al., 2016)                         |
| <i>MYO7A</i>    |                                    |      | ✓   |    |                                                  |     |     |      |       |      |       |     |      |      |      |     |      | ✓   |       |                                                 |      |      | ✓   |      | (Wang et al., 2011; Whatley et al., 2020)    |
| <i>NEK2</i>     | ✓                                  |      |     |    |                                                  |     |     |      |       |      |       |     |      |      |      |     |      |     |       |                                                 |      |      |     |      | (Nishiguchi et al., 2013)                    |
| <i>NEK8</i>     |                                    |      |     |    |                                                  |     |     |      |       | ✓    |       | ✓   |      |      |      |     |      | ✓   |       |                                                 |      | ✓    |     |      | (Ronquillo et al., 2012)                     |
| <i>NPHP1</i>    |                                    |      |     |    |                                                  | ✓   |     |      |       | ✓    |       |     |      |      |      | ✓   |      |     |       |                                                 |      | ✓    |     |      | (Susptsin and Imyanitov, 2016)               |

|                 | Non-syndromic retinal ciliopathies |      |     |    | Syndromic ciliopathies with retinal degeneration |     |     |      |       |      |       |     |      |      |      |     |      |     |       | Other ciliopathies without retinal degeneration |      |      |     |      |                                        | References |
|-----------------|------------------------------------|------|-----|----|--------------------------------------------------|-----|-----|------|-------|------|-------|-----|------|------|------|-----|------|-----|-------|-------------------------------------------------|------|------|-----|------|----------------------------------------|------------|
|                 | RP                                 | CORD | LCA | MD | AS                                               | BBS | CED | CILD | CRDHL | JBTS | MCCRP | MKS | MORM | MRC5 | OFDS | SLS | SRTD | USH | COACH | LGMD                                            | MKKS | NPHP | NSD | SGBS |                                        |            |
| <i>NPHP3</i>    |                                    |      |     |    |                                                  |     |     |      |       |      |       | ✓   |      |      |      | ✓   |      |     |       |                                                 |      | ✓    |     |      | (Luo and Tao, 2018)                    |            |
| <i>NPHP4</i>    |                                    |      |     |    |                                                  |     |     |      |       |      |       |     |      |      |      | ✓   |      |     |       |                                                 |      | ✓    |     |      | (Luo and Tao, 2018)                    |            |
| <i>NPHP5</i>    | ✓                                  |      | ✓   |    |                                                  |     |     |      |       |      |       |     |      |      |      | ✓   |      |     |       |                                                 |      | ✓    |     |      | (Tong et al., 2013; Luo and Tao, 2018) |            |
| <i>OFD1</i>     | ✓                                  |      |     |    |                                                  |     |     |      |       | ✓    |       |     |      |      |      | ✓   |      |     |       |                                                 |      |      |     | ✓    | (Franco and Thauvin-Robinet, 2016)     |            |
| <i>PCDH15</i>   |                                    |      |     |    |                                                  |     |     |      |       |      |       |     |      |      |      |     |      | ✓   |       |                                                 |      |      |     | ✓    | (Whatley et al., 2020)                 |            |
| <i>PDE6D</i>    |                                    |      |     |    |                                                  |     |     |      |       | ✓    |       |     |      |      |      |     |      |     |       |                                                 |      |      |     |      | (Bachmann-Gagescu et al., 2020)        |            |
| <i>PDZD7</i>    |                                    |      |     |    |                                                  |     |     |      |       |      |       |     |      |      |      |     |      | ✓   |       |                                                 |      |      |     |      | (Booth et al., 2015)                   |            |
| <i>PLK4</i>     |                                    |      |     |    |                                                  |     |     |      |       |      | ✓     |     |      |      |      |     |      |     |       |                                                 |      |      |     |      | (Martin et al., 2014)                  |            |
| <i>POC1B</i>    |                                    | ✓    |     |    |                                                  |     |     |      |       | ✓    |       |     |      |      |      |     |      |     |       |                                                 |      |      |     |      | (Beck et al., 2014)                    |            |
| <i>RAB28</i>    |                                    | ✓    |     |    |                                                  |     |     |      |       |      |       |     |      |      |      |     |      |     |       |                                                 |      |      |     |      | (Gill et al., 2019)                    |            |
| <i>RP1</i>      | ✓                                  |      |     | ✓  |                                                  |     |     |      |       |      |       |     |      |      |      |     |      |     |       |                                                 |      |      |     |      | (Riera et al., 2020)                   |            |
| <i>RP1L1</i>    | ✓                                  |      |     | ✓  |                                                  |     |     |      |       |      |       |     |      |      |      |     |      |     |       |                                                 |      |      |     |      | (Noel and MacDonald, 2020)             |            |
| <i>RP2</i>      | ✓                                  |      |     |    |                                                  |     |     |      |       |      |       |     |      |      |      |     |      |     |       |                                                 |      |      |     |      | (Zhang et al., 2015)                   |            |
| <i>RPGR</i>     | ✓                                  | ✓    |     | ✓  |                                                  |     |     | ✓    |       |      |       |     |      |      |      |     |      |     |       |                                                 |      |      |     |      | (Shu et al., 2007)                     |            |
| <i>RPGRIP1</i>  | ✓                                  | ✓    | ✓   |    |                                                  |     |     |      |       |      |       |     |      |      |      |     |      |     |       |                                                 |      |      |     |      | (Raghupathy et al., 2017)              |            |
| <i>RPGRIP1L</i> | ✓                                  |      | ✓   |    |                                                  | ✓   |     |      |       | ✓    |       | ✓   |      |      |      |     |      |     | ✓     |                                                 |      | ✓    |     |      | (Wiegering et al., 2018)               |            |
| <i>SCAPER</i>   | ✓                                  |      |     |    |                                                  |     |     |      |       |      |       |     |      |      |      |     |      |     |       |                                                 |      |      |     |      | (Jauregui et al., 2019)                |            |
| <i>SDCCAG8</i>  |                                    |      |     |    |                                                  | ✓   |     |      |       |      |       |     |      |      |      | ✓   |      |     |       |                                                 |      |      |     |      | (Suspitsin and Imyanitov, 2016)        |            |
| <i>SPATA7</i>   | ✓                                  |      | ✓   |    |                                                  |     |     |      |       |      |       |     |      |      |      |     |      |     |       |                                                 |      |      |     |      | (Mackay et al., 2011)                  |            |

|                | Non-syndromic retinal ciliopathies |      |     |    | Syndromic ciliopathies with retinal degeneration |     |     |      |       |      |       |     |      |      |      |     |      |     |       | Other ciliopathies without retinal degeneration |      |      |     |      | References                         |                        |
|----------------|------------------------------------|------|-----|----|--------------------------------------------------|-----|-----|------|-------|------|-------|-----|------|------|------|-----|------|-----|-------|-------------------------------------------------|------|------|-----|------|------------------------------------|------------------------|
|                | RP                                 | CORD | LCA | MD | AS                                               | BBS | CED | CILD | CRDHL | JBTS | MCCRP | MKS | MORM | MRC5 | OFDS | SLS | SRTD | USH | COACH | LGMD                                            | MKKS | NPHP | NSD | SGBS |                                    |                        |
| <i>TBC1D32</i> |                                    |      |     |    |                                                  |     |     |      |       |      |       |     |      |      |      |     |      |     |       |                                                 |      |      |     |      | (Franco and Thauvin-Robinet, 2016) |                        |
| <i>TMEM107</i> |                                    |      |     |    |                                                  |     |     |      |       | ✓    |       | ✓   |      |      |      |     |      |     |       |                                                 |      |      |     |      | (Lambacher et al., 2016)           |                        |
| <i>TMEM138</i> |                                    |      |     |    |                                                  |     |     |      |       | ✓    |       |     |      |      |      |     |      |     |       |                                                 |      |      |     |      | (Bachmann-Gagescu et al., 2020)    |                        |
| <i>TMEM216</i> |                                    |      |     |    |                                                  |     |     |      |       | ✓    |       | ✓   |      |      |      |     |      |     |       |                                                 |      |      |     |      | (Valente et al., 2010)             |                        |
| <i>TMEM218</i> |                                    |      |     |    |                                                  |     |     |      |       | ✓    |       | ✓   |      |      |      |     |      |     |       |                                                 |      |      |     |      | (Van De Weghe et al., 2021)        |                        |
| <i>TMEM231</i> |                                    |      |     |    |                                                  |     |     |      |       | ✓    |       | ✓   |      |      |      |     |      | ✓   |       |                                                 |      |      |     |      | (Roberson et al., 2015)            |                        |
| <i>TMEM237</i> |                                    |      |     |    |                                                  |     |     |      |       | ✓    |       |     |      |      |      |     |      |     |       |                                                 |      |      |     |      | (Bachmann-Gagescu et al., 2020)    |                        |
| <i>TMEM67</i>  |                                    |      |     |    |                                                  | ✓   |     |      |       | ✓    |       | ✓   |      |      |      |     |      | ✓   |       |                                                 |      | ✓    |     |      | (Radhakrishnan et al., 2019)       |                        |
| <i>TOPORS</i>  | ✓                                  |      |     |    |                                                  |     |     |      |       |      |       |     |      |      |      |     |      |     |       |                                                 |      |      |     |      | (Chakarova et al., 2007)           |                        |
| <i>TRIM32</i>  |                                    |      |     |    |                                                  | ✓   |     |      |       |      |       |     |      |      |      |     |      |     |       | ✓                                               |      |      |     |      | (Suspitsin and Imyanitov, 2016)    |                        |
| <i>TTLL5</i>   |                                    | ✓    |     |    |                                                  |     |     |      |       |      |       |     |      |      |      |     |      |     |       |                                                 |      |      |     |      | (Gill et al., 2019)                |                        |
| <i>TUBB4B</i>  |                                    |      | ✓   |    |                                                  |     |     |      |       |      |       |     |      |      |      |     |      |     |       |                                                 |      |      |     |      | (Luscan et al., 2017)              |                        |
| <i>TUBGCP4</i> |                                    |      |     |    |                                                  |     |     |      |       |      | ✓     |     |      |      |      |     |      |     |       |                                                 |      |      |     |      | (Scheidecker et al., 2015)         |                        |
| <i>TULP1</i>   | ✓                                  |      | ✓   |    |                                                  |     |     |      |       |      |       |     |      |      |      |     |      |     |       |                                                 |      |      |     |      | (Jacobson et al., 2014)            |                        |
| <i>UNC119</i>  |                                    | ✓    |     |    |                                                  |     |     |      |       | ✓    |       |     |      |      |      |     |      |     |       |                                                 |      |      |     |      | (Kobayashi et al., 2000)           |                        |
| <i>USH1C</i>   |                                    |      |     |    |                                                  |     |     |      |       |      |       |     |      |      |      |     |      |     |       |                                                 |      |      |     | ✓    | (Whatley et al., 2020)             |                        |
| <i>USH1G</i>   |                                    |      |     |    |                                                  |     |     |      |       |      |       |     |      |      |      |     |      |     |       |                                                 |      |      |     | ✓    | (Whatley et al., 2020)             |                        |
| <i>USH2A</i>   | ✓                                  |      |     |    |                                                  |     |     |      |       |      |       |     |      |      |      |     |      |     |       |                                                 |      |      |     |      | (Whatley et al., 2020)             |                        |
| <i>USH2C</i>   |                                    |      |     |    |                                                  |     |     |      |       |      |       |     |      |      |      |     |      |     |       |                                                 |      |      |     |      | ✓                                  | (Whatley et al., 2020) |
| <i>USH2D</i>   |                                    |      |     |    |                                                  |     |     |      |       |      |       |     |      |      |      |     |      |     |       |                                                 |      |      |     | ✓    | (Whatley et al., 2020)             |                        |

|              | Non-syndromic retinal ciliopathies |      |     |    | Syndromic ciliopathies with retinal degeneration |     |     |      |       |      |       |     |      |      |      |     |      |     | Other ciliopathies without retinal degeneration |      |      |      |     | References |                                 |
|--------------|------------------------------------|------|-----|----|--------------------------------------------------|-----|-----|------|-------|------|-------|-----|------|------|------|-----|------|-----|-------------------------------------------------|------|------|------|-----|------------|---------------------------------|
|              | RP                                 | CORD | LCA | MD | AS                                               | BBS | CED | CILD | CRDHL | JBTS | MCCRP | MKS | MORM | MRCs | OFDS | SLS | SRTD | USH | COACH                                           | LGMD | MKKS | NPHP | NSD |            | SGBS                            |
| <i>WDPCP</i> |                                    |      |     |    |                                                  | ✓   |     |      |       |      |       |     |      |      |      |     |      |     |                                                 |      |      |      |     |            | (Suspitsin and Imyanitov, 2016) |

<sup>a</sup>From RetNet, OMIM, Syscilia, CiliaCarta and HGMD databases.

<sup>b</sup>AS, Alström syndrome; BBS, Bardet-Biedl syndrome; CED, cranioectodermal dysplasia; CILD, ciliary dyskinesia; COACH, cerebellar vermis, hypo/aplasia, oligophrenia, congenital ataxia, ocular coloboma, and hepatic fibrosis; CORD, cone-rod dystrophy; CRDHL, cone-rod dystrophy and hearing loss; JBTS, Joubert syndrome; LCA, Leber congenital amaurosis; LGMD, limb-girdle muscular dystrophy; MCCRP, microcephaly and chorioretinopathy; MD, macular dystrophy; MKKS, McKusick-Kaufman syndrome; MKS, Meckel-Gruber syndrome; MORM, mental retardation, truncal obesity, retinal dystrophy, and micropenis; MRCs, microcornea-rod-cone dystrophy-cataract-posterior staphyloma syndrome; NPHP, nephronophthisis; NSD, non-syndromic deafness; OFDS, orofacialdigital syndrome; RP, retinitis pigmentosa; SGBS, Simpson-Golabi-Behmel syndrome; SLS, Senior-Løken syndrome; SRTD, short rib thoracic dysplasia with or without polydactyly; USH, Usher syndrome.

<sup>c</sup>Genes are listed in alphabetic order: non-syndromic retinal ciliopathies causative genes are in blue, genes whose mutations result in syndromic retinal ciliopathies are in orange, and genes which, depending on the mutation, can cause both non-syndromic and syndromic retinal ciliopathies are in dark red. Non-syndromic retinal ciliopathies are colored in light blue, syndromic ciliopathies with retinal degeneration are in light orange, and other ciliopathies that do not show retinal degeneration as a phenotype are in light purple.
